# Supplementary material
Source: ML conference proceedings conference paper supplement (https://openreview.net/forum?id=X0ytIvgvxR)

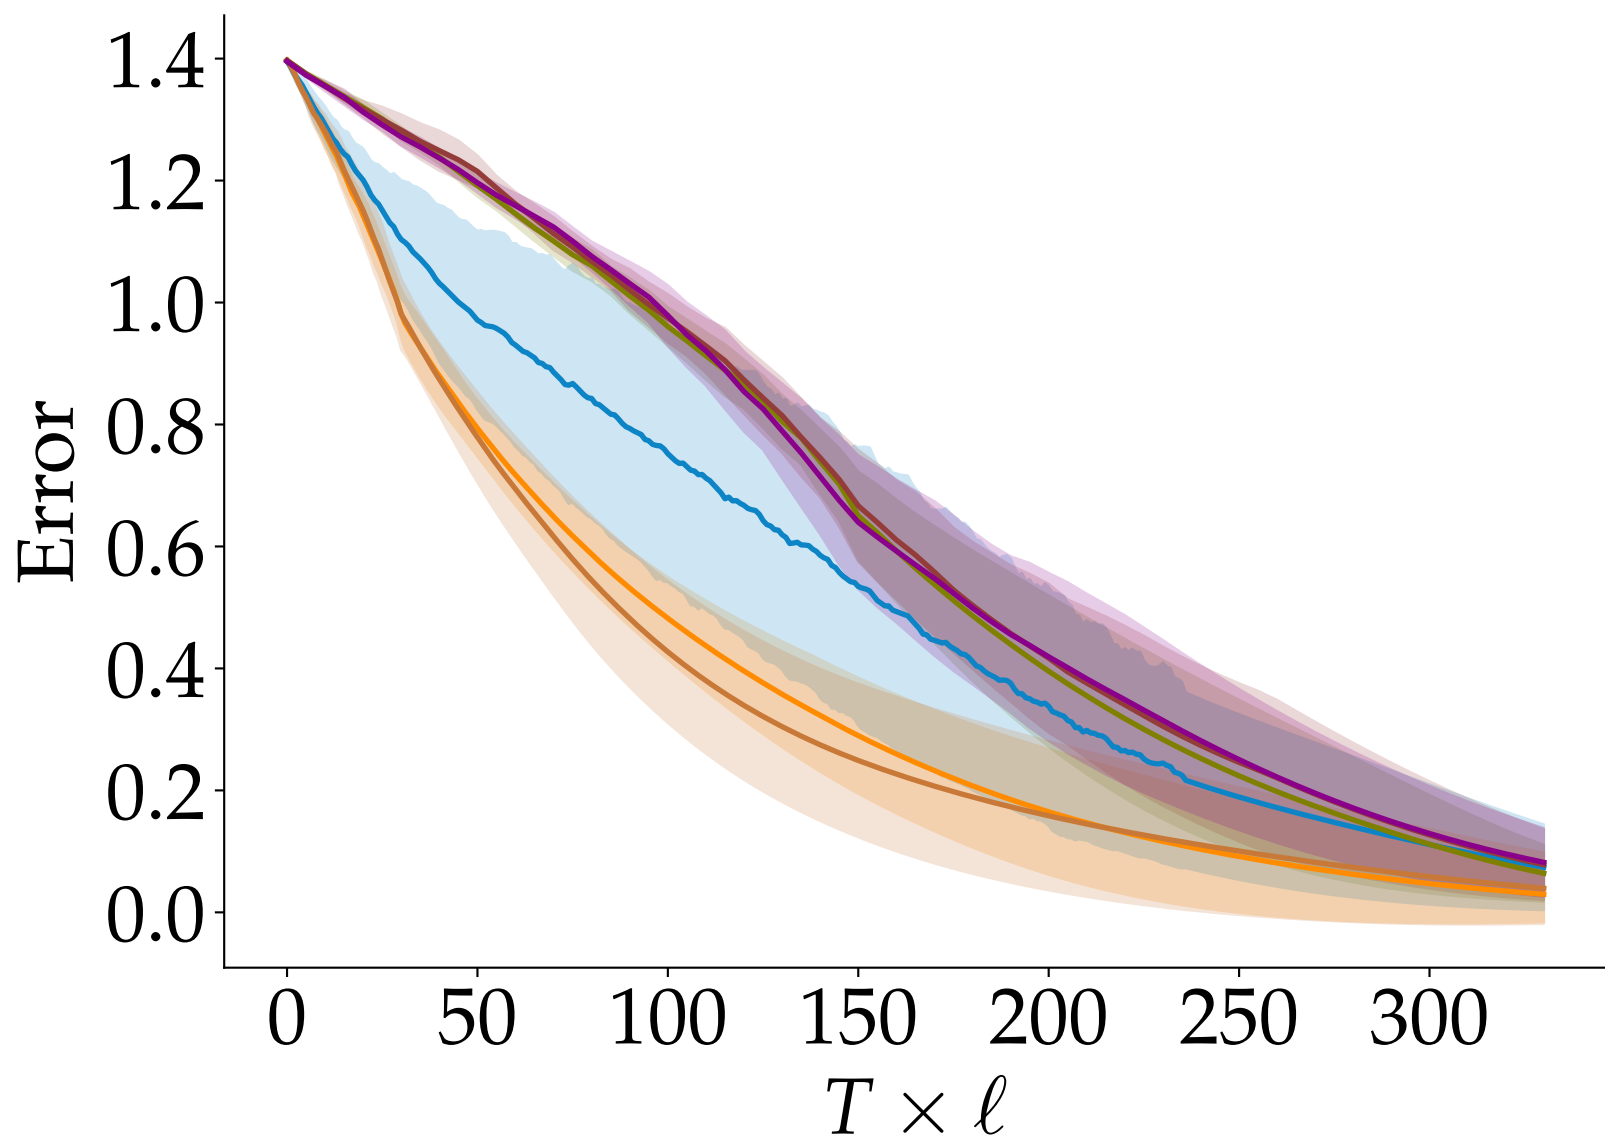

— P-Deflation,  $T = 1$

— EigGame- $\alpha$ ,  $T = 1$

— EigGame- $\mu$ ,  $T = 1$

— P-Deflation,  $T = 5$

— EigGame- $\alpha$ ,  $T = 5$

— EigGame- $\mu$ ,  $T = 5$

Supplement: supplementary_material [file attachment]

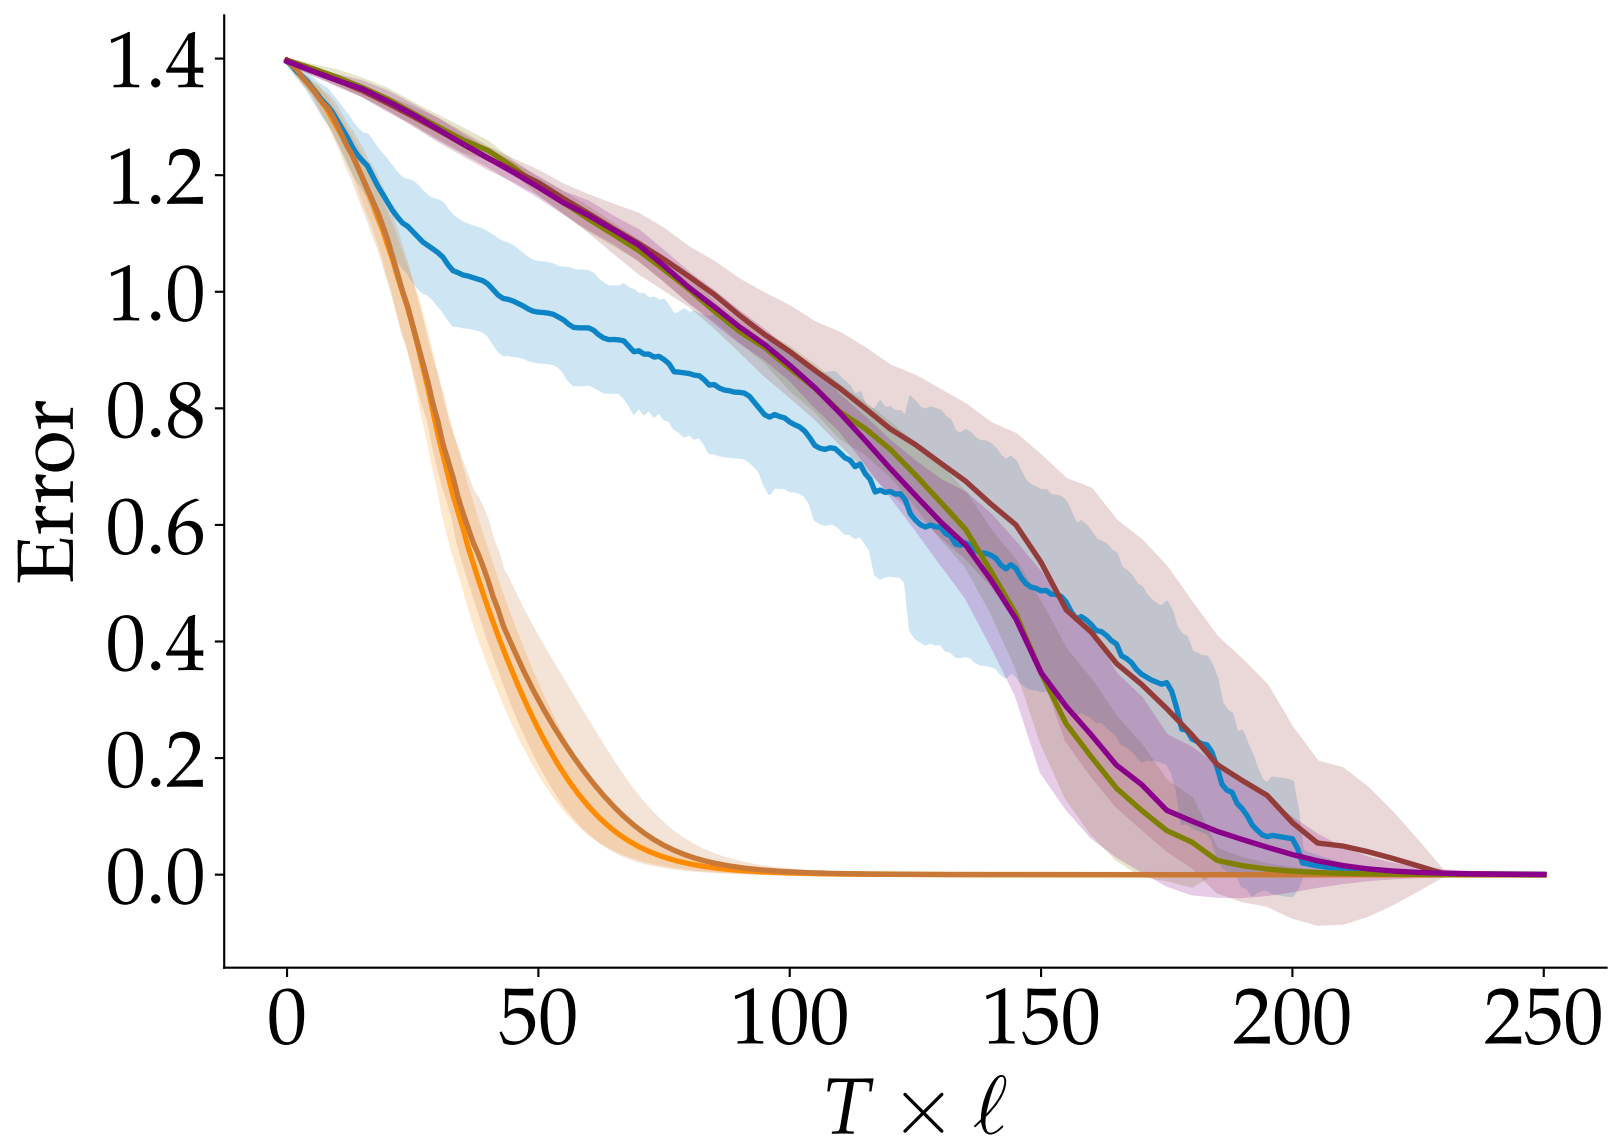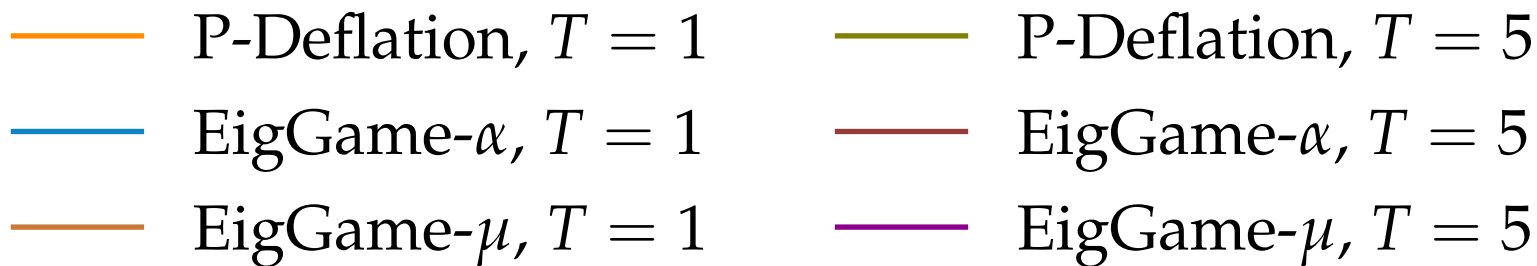

Supplement: supplementary_material [file attachment]

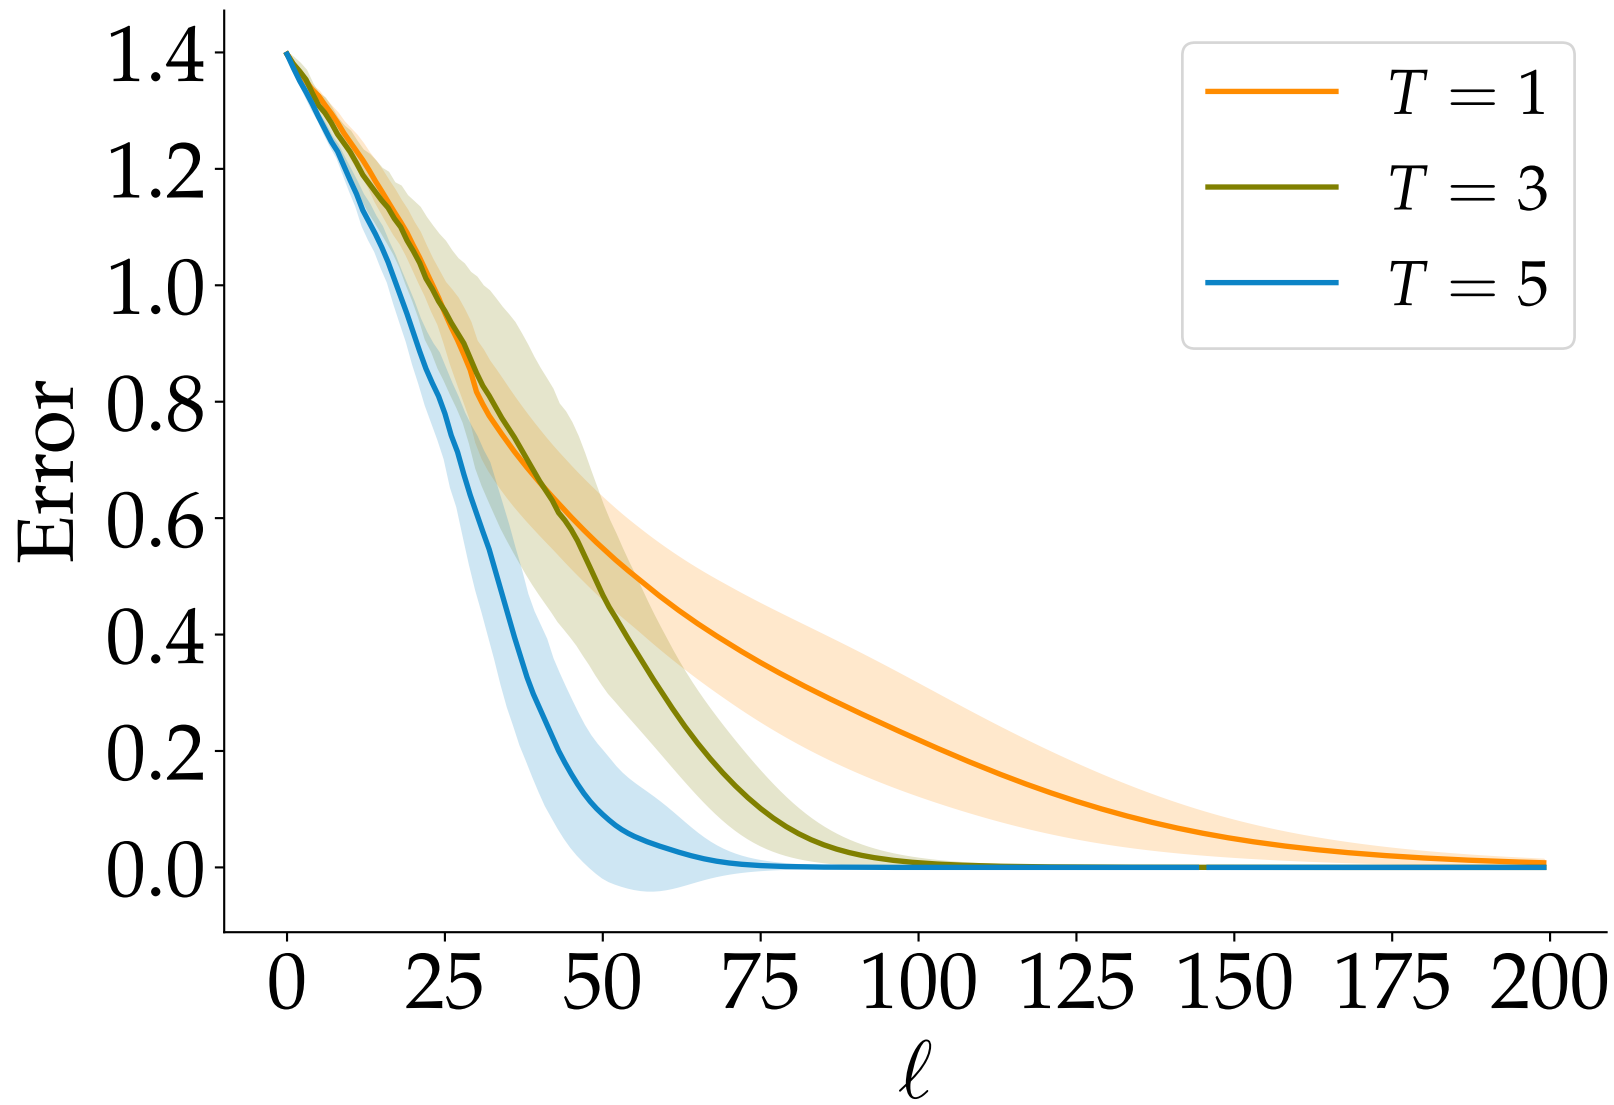

Supplement: supplementary_material [file attachment]

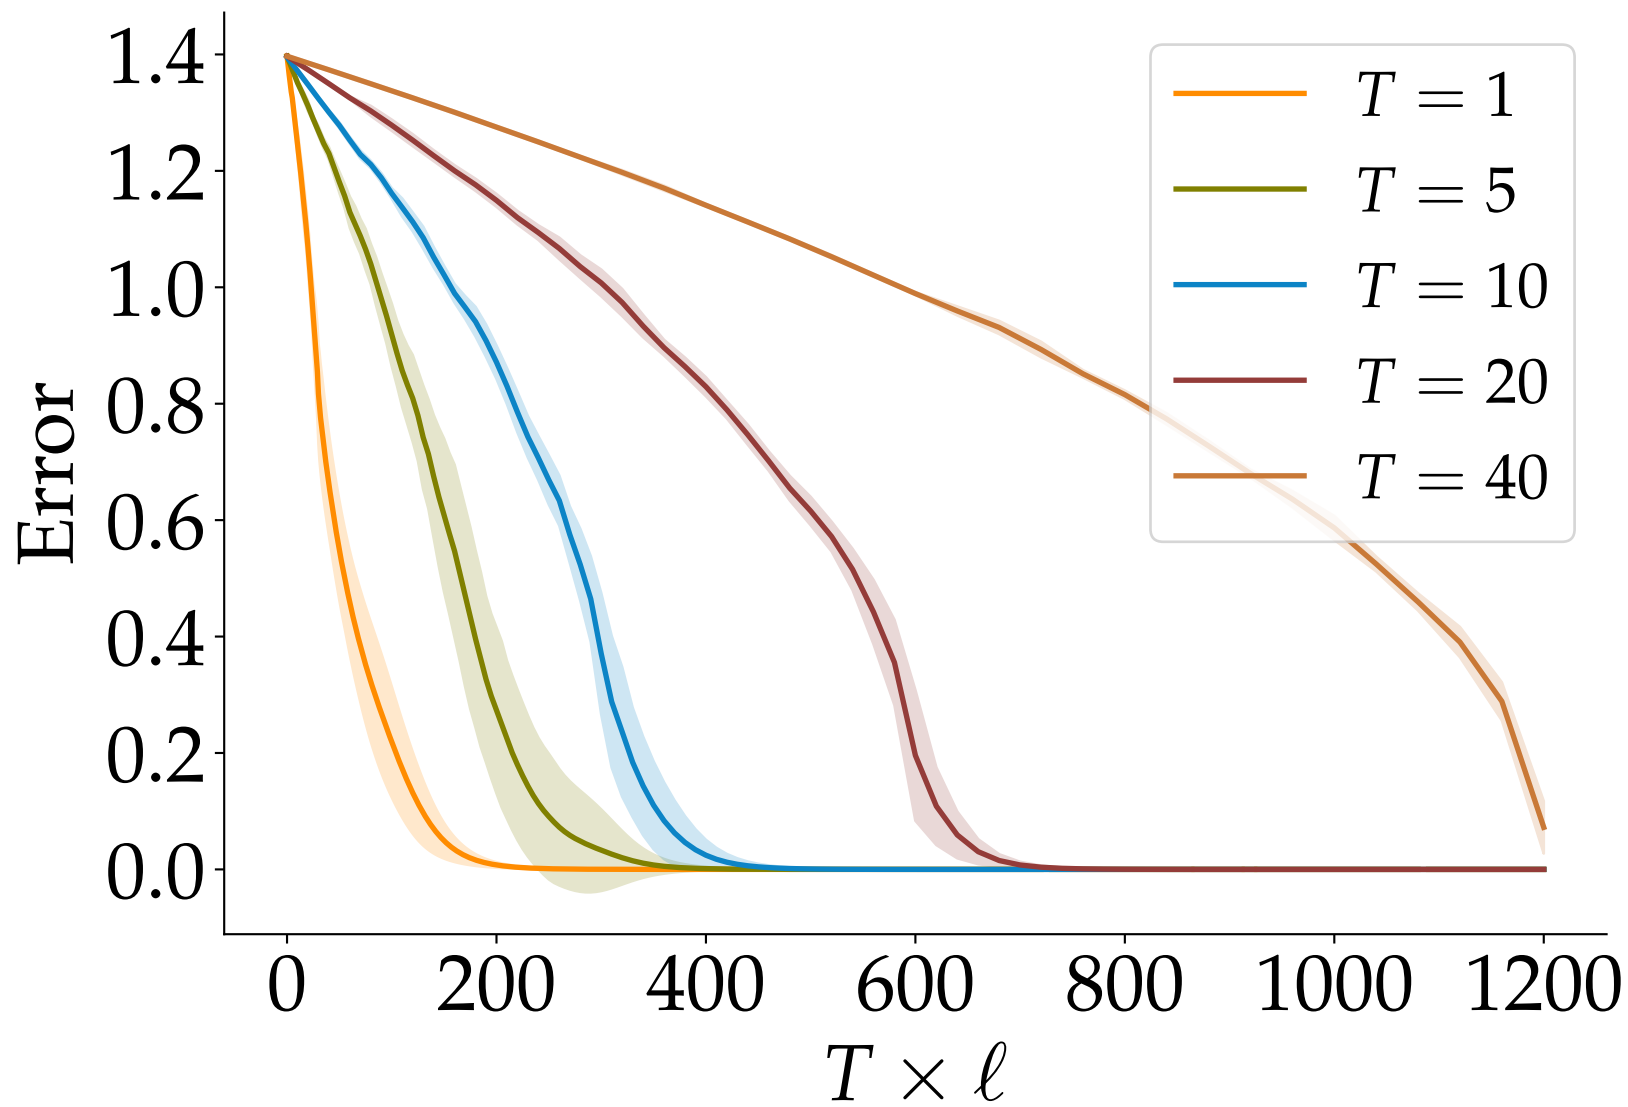

Supplement: supplementary_material [file attachment]

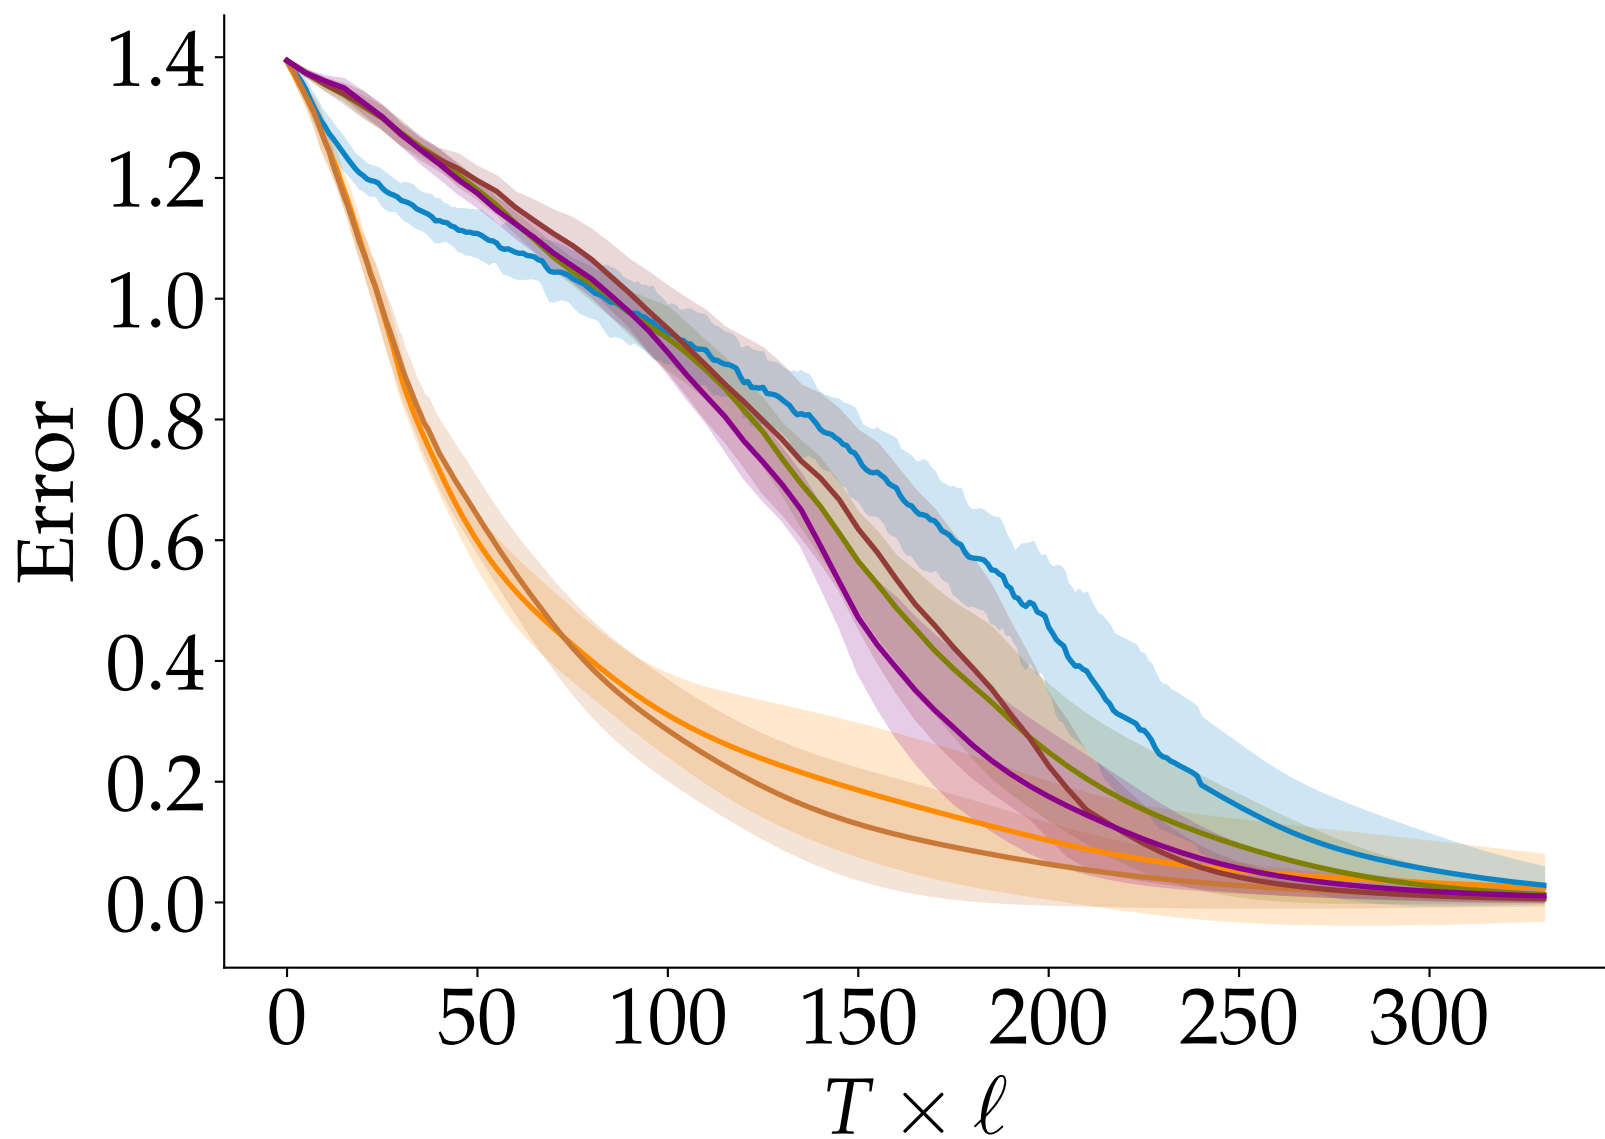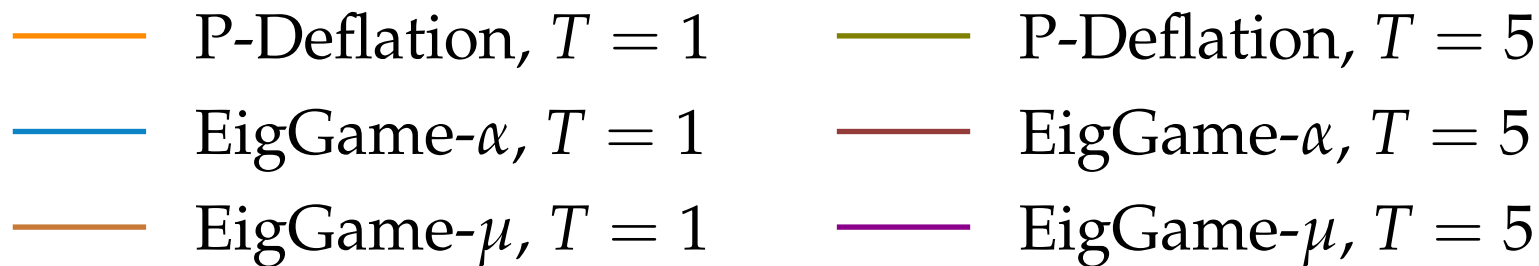

Supplement: supplementary_material [file attachment]
